# Supplementary material
Source: Springer Nature journal article supplement (https://www.springermedizin.de/resource/supplementary/12939_2009_136_MOESM3_ESM.pdf/9551560)

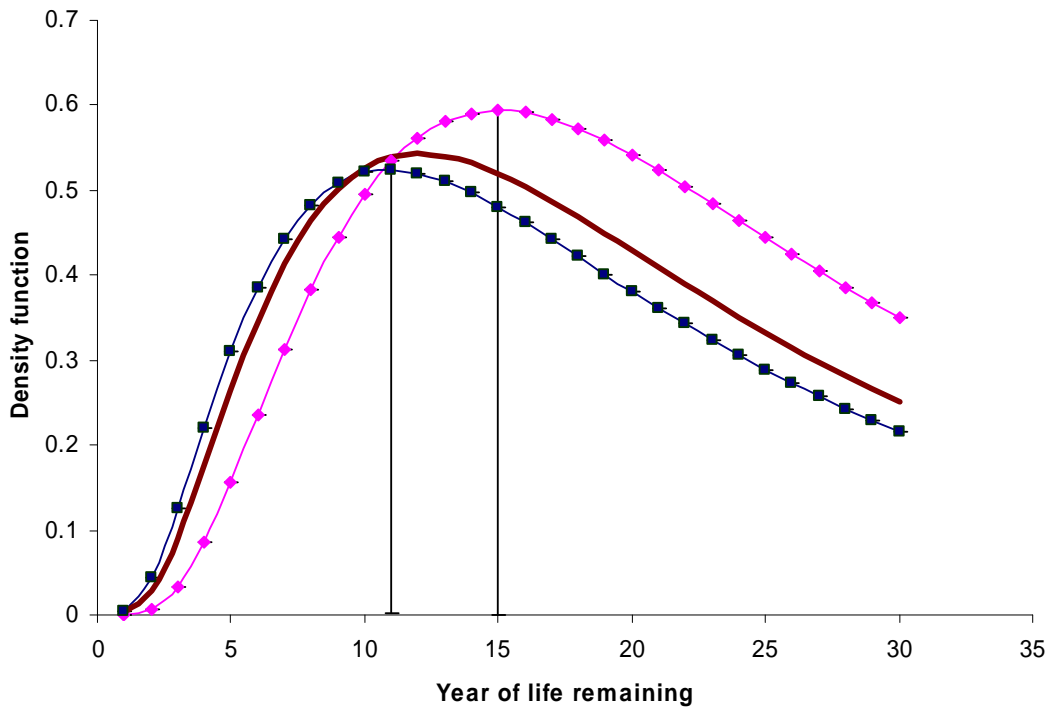

◆ Female ■ Males — All individuals

Supplement: MOESM3 [file 9551560]
